# Supplementary material for: Ultrafast studies of some diarylcarbenes
Source: Royal Society of Chemistry journal article supplement (doi:10.1039/b800041g), 2008-03-20
Supplement: b800041g.pdf [file b800041g.pdf]

## Ultrafast Studies of Some Diaryl Carbenes

*Jin Wang,<sup>†</sup> Yunlong Zhang,<sup>†</sup> Jacek Kubicki,<sup>†,‡</sup> and Matthew S. Platz<sup>†,\*</sup>*

<sup>†</sup>Department of Chemistry, The Ohio State University, 100 West 18<sup>th</sup> Avenue,  
Columbus, Ohio, 43210, <sup>‡</sup>the Quantum Electronics Laboratory, Faculty of Physics, Adam  
Mickiewicz University, 85 Umultowska, Poznan 61-614, Poland

platz.1@osu.edu

## List of Tables

|                                                                                                                     |   |
|---------------------------------------------------------------------------------------------------------------------|---|
| Table S1. TD-B3LYP/6-311+G(d,p)//B3LYP/6-31G(d) calculations of singlet DBC and its Cartesian coordinates.....      | 4 |
| Table S2. TD-B3LYP/6-311+G(d,p)//B3LYP/6-31G(d) calculations of triplet DBC and its Cartesian coordinates.....      | 5 |
| Table S3. TD-B3LYP/6-311+G(d,p)//B3LYP/6-31G(d) calculations of singlet AN and its Cartesian coordinates.....       | 6 |
| Table S4. TD-B3LYP/6-311+G(d,p)//B3LYP/6-31G(d) calculations of triplet AN and its Cartesian coordinates.....       | 7 |
| Table S5. TD-B3LYP/6-311+G(d,p)//B3LYP/6-31G(d) calculations of ANH <sup>+</sup> and its Cartesian coordinates..... | 9 |

## List of Figures

|                                                                                                                                                                                                                                                                                                                                                                                                                                                                                                                                                                                                            |    |
|------------------------------------------------------------------------------------------------------------------------------------------------------------------------------------------------------------------------------------------------------------------------------------------------------------------------------------------------------------------------------------------------------------------------------------------------------------------------------------------------------------------------------------------------------------------------------------------------------------|----|
| Figure S1. Kinetic traces were produced by ultrafast LFP ( $\lambda_{\text{ex}} = 308$ nm) of DDBC in acetonitrile. The kinetic traces were probed at 350, 360, 370, 380 and 400 nm, respectively and globally fitted in equation $\Delta OD = A_1 \exp(-t/\tau_1) + A_2 \exp(-t/\tau_2) + A_3$ , where $\tau_1$ is unlinked and $\tau_2$ is linked. The value $83 \pm 3$ ps shown above is the common time constant $\tau_2$ , which is assigned to the lifetime of <sup>1</sup> DBC in acetonitrile. ....                                                                                                | 10 |
| Figure S2. The transient spectra were generated by ultrafast LFP (308 nm) of DDBC in cyclohexane with time windows (a) 2–30 ps, (b) 40–200 ps and (c) 500–2500 ps.....                                                                                                                                                                                                                                                                                                                                                                                                                                     | 10 |
| Figure S3. Kinetic traces were produced by ultrafast LFP ( $\lambda_{\text{ex}} = 308$ nm) of DDBC in cyclohexane. The kinetic traces were probed at 350, 360, 370 and 380, respectively and globally fitted to the equation $\Delta OD = A_1 \exp(-t/\tau_1) + A_2 \exp(-t/\tau_2) + A_3$ , where $\tau_1$ is unlinked and $\tau_2$ is linked. The value $72 \pm 3$ ps shown in the figure is the common time constant $\tau_2$ , which is assigned to the lifetime of <sup>1</sup> DBC in cyclohexane. The kinetic traces are separated by 50 ps for clarity. ....                                       | 11 |
| Figure S4. Kinetic traces were produced by ultrafast LFP ( $\lambda_{\text{ex}} = 308$ nm) of DDBC in cyclohexene. The kinetic traces were probed at 350, 360, 370 and 380, respectively and globally fitted to the equation $\Delta OD = A_1 \exp(-t/\tau_1) + A_2 \exp(-t/\tau_2) + A_3$ , where $\tau_1$ is unlinked and $\tau_2$ is linked. The value $47 \pm 3$ ps shown in the figure is the common time constant $\tau_2$ , which is assigned to the lifetime of <sup>1</sup> DBC in cyclohexene. The kinetic traces are separated by 50 ps for clarity. ....                                       | 11 |
| Figure S5. Kinetic traces were produced by ultrafast LFP ( $\lambda_{\text{ex}} = 308$ nm) of DAN in acetonitrile. The kinetic traces were probed at 350 and 440, respectively and globally fitted to the equations $\Delta OD = A_1 \exp(-t/\tau_1) + A_2$ and $\Delta OD = A_1 \exp(-t/\tau_1) + A_2 \exp(-t/\tau_2) + A_3$ , where $\tau_1$ is linked. The value $87 \pm 9$ ps shown above is the common time constant $\tau_1$ , which is assigned to the lifetime of <sup>1</sup> AN in acetonitrile. $\tau_2$ is $24 \pm 3$ ps, which is assigned to the vibrational cooling of <sup>1</sup> AN..... | 12 |
| Figure S6. Transient spectra were generated by ultrafast LFP ( $\lambda_{\text{ex}} = 308$ nm) of DAN in cyclohexane with time windows of (a) 0.10–0.70 ps, (b) 1–20 ps and (c) 20–1000 ps. ....                                                                                                                                                                                                                                                                                                                                                                                                           | 13 |
| Figure S7. Transient spectra were generated by ultrafast LFP ( $\lambda_{\text{ex}} = 308$ nm) of DAN in methanol with time windows of (a) 0.25–0.70 ps, (b) 0.9–5 ps and (c) 5–50 ps. ....                                                                                                                                                                                                                                                                                                                                                                                                                | 14 |

Figure S8. Transient spectra were generated by ultrafast LFP ( $\lambda_{\text{ex}} = 308 \text{ nm}$ ) of DAN in 2,2,2-trifluoroethanol with a time window of 1–20 ps. .... 15

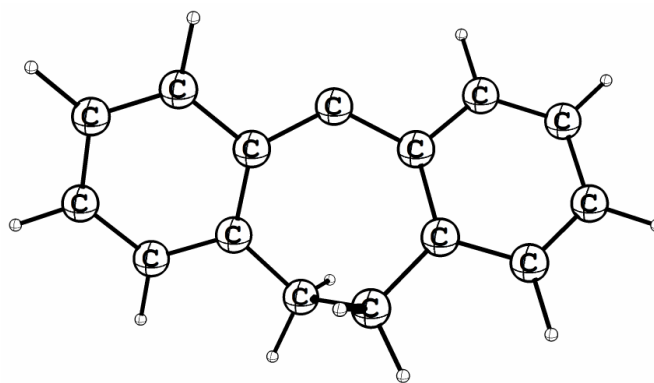

E = -578.860935925 Hartree

| $\lambda_{\max}$ | $f$    | $\lambda_{\max}$ | $f$    | Cartesian Coordinates |           |           |           |
|------------------|--------|------------------|--------|-----------------------|-----------|-----------|-----------|
| 1679.89          | 0.0047 | 259.88           | 0.0084 | C                     | -0.546437 | 1.720482  | 0.541907  |
|                  |        |                  |        | C                     | 0.546413  | 1.720584  | -0.541637 |
|                  |        |                  |        | C                     | 1.614793  | 0.683587  | -0.292085 |
| 374.73           | 0.0025 | 259.52           | 0.0315 | C                     | 1.285852  | -0.676437 | 0.015988  |
|                  |        |                  |        | C                     | -0.000018 | -1.342430 | 0.000205  |
|                  |        |                  |        | C                     | -1.285832 | -0.676465 | -0.015842 |
| 371.40           | 0.0021 | 253.39           | 0.0117 | C                     | -1.614828 | 0.683575  | 0.292090  |
|                  |        |                  |        | C                     | -2.364194 | -1.559544 | -0.298511 |
|                  |        |                  |        | C                     | -3.690481 | -1.147173 | -0.304210 |
| 360.34           | 0.0018 | 250.60           | 0.0255 | C                     | -3.985669 | 0.173564  | 0.039055  |
|                  |        |                  |        | C                     | -2.955365 | 1.068897  | 0.341482  |
|                  |        |                  |        | C                     | 2.955332  | 1.068899  | -0.341664 |
| 359.11           | 0.0380 | 240.78           | 0.0066 | C                     | 3.985667  | 0.173564  | -0.039357 |
|                  |        |                  |        | C                     | 3.690530  | -1.147157 | 0.304024  |
|                  |        |                  |        | C                     | 2.364234  | -1.559513 | 0.298564  |
| 341.94           | 0.0335 | 238.08           | 0.0039 | H                     | -0.076688 | 1.562985  | 1.523898  |
|                  |        |                  |        | H                     | -1.018380 | 2.708908  | 0.581579  |
|                  |        |                  |        | H                     | 1.018370  | 2.709008  | -0.581101 |
| 324.48           | 0.4712 | 234.94           | 0.0029 | H                     | 0.076627  | 1.563287  | -1.523644 |
|                  |        |                  |        | H                     | -2.092786 | -2.590241 | -0.503309 |
|                  |        |                  |        | H                     | -4.487467 | -1.846861 | -0.540024 |
| 295.14           | 0.0011 | 226.23           | 0.0019 | H                     | -5.018017 | 0.513581  | 0.071226  |
|                  |        |                  |        | H                     | -3.203034 | 2.098096  | 0.593071  |
|                  |        |                  |        | H                     | 3.202983  | 2.098086  | -0.593321 |
| 278.23           | 0.0185 | 225.06           | 0.0030 | H                     | 5.018015  | 0.513568  | -0.071699 |
|                  |        |                  |        | H                     | 4.487552  | -1.846828 | 0.539766  |
|                  |        |                  |        | H                     | 2.092851  | -2.590189 | 0.503514  |

**Table S1.** TD-B3LYP/6-311+G(d,p)//B3LYP/6-31G(d) calculations of singlet DBC and its Cartesian coordinates

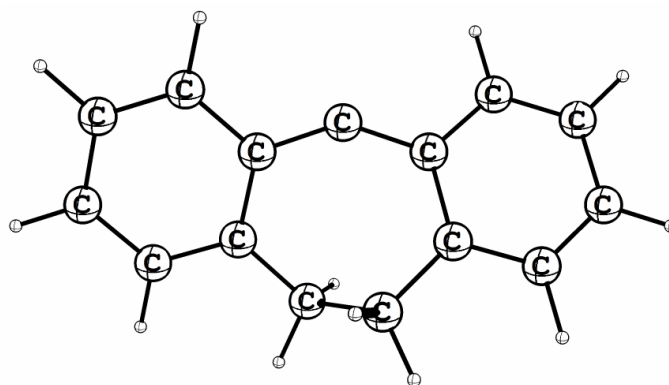

E = -578.875296183 Hartree

| $\lambda_{\max}$ | $f$    | $\lambda_{\max}$ | $f$    | Cartesian Coordinates |           |           |           |
|------------------|--------|------------------|--------|-----------------------|-----------|-----------|-----------|
| 438.01           | 0.0077 | 297.53           | 0.0139 | C                     | 0.582219  | 1.721959  | -0.512910 |
|                  |        |                  |        | C                     | -0.582190 | 1.721858  | 0.513156  |
|                  |        |                  |        | C                     | -1.663063 | 0.699586  | 0.246312  |
| 399.11           | 0.0001 | 289.17           | 0.0000 | C                     | -1.329388 | -0.673673 | -0.000279 |
|                  |        |                  |        | C                     | -0.000027 | -1.126683 | -0.000129 |
|                  |        |                  |        | C                     | 1.329387  | -0.673638 | 0.000255  |
| 395.56           | 0.0042 | 288.8            | 0.0021 | C                     | 1.663079  | 0.699585  | -0.246392 |
|                  |        |                  |        | C                     | 2.385523  | -1.599443 | 0.229227  |
|                  |        |                  |        | C                     | 3.711272  | -1.194288 | 0.222543  |
| 352.63           | 0.0069 | 279.72           | 0.0001 | C                     | 4.029537  | 0.148703  | -0.009029 |
|                  |        |                  |        | C                     | 3.004818  | 1.073851  | -0.236149 |
|                  |        |                  |        | C                     | -3.004786 | 1.073896  | 0.235984  |
| 352.30           | 0.0523 | 277.49           | 0.001  | C                     | -4.029525 | 0.148758  | 0.008896  |
|                  |        |                  |        | C                     | -3.711299 | -1.194272 | -0.222485 |
|                  |        |                  |        | C                     | -2.385563 | -1.599469 | -0.229112 |
| 345.17           | 0.0224 | 273.95           | 0.0288 | H                     | 0.161229  | 1.570067  | -1.517423 |
|                  |        |                  |        | H                     | 1.042963  | 2.716372  | -0.521274 |
|                  |        |                  |        | H                     | -1.042866 | 2.716300  | 0.521805  |
| 323.53           | 0.0021 | 272.76           | 0.0009 | H                     | -0.161253 | 1.569643  | 1.517644  |
|                  |        |                  |        | H                     | 2.127906  | -2.638713 | 0.411364  |
|                  |        |                  |        | H                     | 4.499821  | -1.920439 | 0.401052  |
| 323.34           | 0.5225 | 257.07           | 0.0028 | H                     | 5.065616  | 0.475438  | -0.011566 |
|                  |        |                  |        | H                     | 3.257487  | 2.117275  | -0.413609 |
|                  |        |                  |        | H                     | -3.257427 | 2.117334  | 0.413396  |
| 320.69           | 0.0024 | 256.16           | 0.0157 | H                     | -5.065594 | 0.475528  | 0.011353  |
|                  |        |                  |        | H                     | -4.499871 | -1.920420 | -0.400907 |
|                  |        |                  |        | H                     | -2.127977 | -2.638763 | -0.411155 |

**Table S2.** TD-B3LYP/6-311+G(d,p)//B3LYP/6-31G(d) calculations of triplet DBC and its Cartesian coordinates

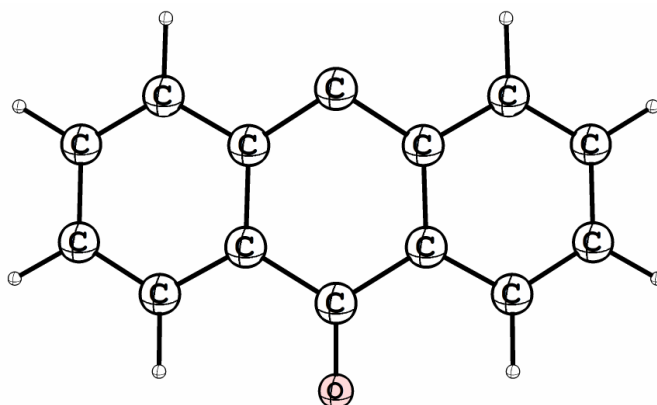

E = -613.587596881 Hartree

| $\lambda_{\max}$ | $f$    | $\lambda_{\max}$ | $f$    | Cartesian Coordinates |           |           |           |
|------------------|--------|------------------|--------|-----------------------|-----------|-----------|-----------|
| 1581.22          | 0.0024 | 257.57           | 0.3551 | C                     | -1.220926 | -0.911958 | 0.076791  |
|                  |        |                  |        | C                     | -1.267712 | 0.511768  | 0.049152  |
| 493.2            | 0.0017 | 253.12           | 0.1231 | C                     | 0.000000  | 1.294821  | 0.077572  |
|                  |        |                  |        | C                     | 1.267711  | 0.511768  | 0.049148  |
| 459.29           | 0.0029 | 247.12           | 0.0067 | C                     | 1.220926  | -0.911960 | 0.076786  |
|                  |        |                  |        | C                     | 0.000000  | -1.664175 | 0.281399  |
| 433.79           | 0.0373 | 245.84           | 0.0056 | C                     | -2.438574 | -1.619380 | -0.013023 |
|                  |        |                  |        | C                     | -3.651887 | -0.947556 | -0.142554 |
| 382.34           | 0.1331 | 244.12           | 0.2308 | C                     | -3.677093 | 0.451450  | -0.123772 |
|                  |        |                  |        | C                     | -2.489278 | 1.179764  | -0.014149 |
| 367.16           | 0.0312 | 237.47           | 0.0213 | C                     | 2.489277  | 1.179764  | -0.014143 |
|                  |        |                  |        | C                     | 3.677092  | 0.451450  | -0.123766 |
| 335.68           | 0.0343 | 237.4            | 0.0117 | C                     | 3.651886  | -0.947556 | -0.142557 |
|                  |        |                  |        | C                     | 2.438574  | -1.619381 | -0.013032 |
| 308.09           | 0.0007 | 229.04           | 0.0004 | O                     | 0.000001  | 2.522763  | 0.075892  |
|                  |        |                  |        | H                     | -2.393370 | -2.703512 | 0.027189  |
| 289.37           | 0.0055 | 227.19           | 0.0169 | H                     | -4.580197 | -1.505989 | -0.225232 |
|                  |        |                  |        | H                     | -4.626458 | 0.976764  | -0.186833 |
| 282.83           | 0.0707 | 223.87           | 0.0034 | H                     | -2.494301 | 2.265222  | 0.009750  |
|                  |        |                  |        | H                     | 2.494302  | 2.265222  | 0.009758  |
|                  |        |                  |        | H                     | 4.626458  | 0.976764  | -0.186821 |
|                  |        |                  |        | H                     | 4.580197  | -1.505988 | -0.225237 |
|                  |        |                  |        | H                     | 2.393371  | -2.703513 | 0.027175  |

**Table S3.** TD-B3LYP/6-311+G(d,p)//B3LYP/6-31G(d) calculations of singlet AN and its Cartesian coordinates

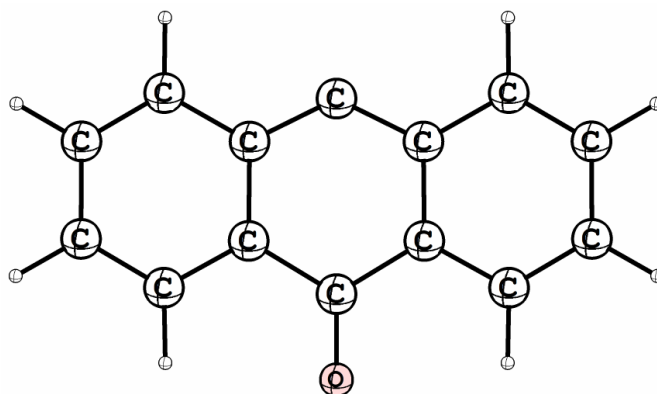

E = -613.601805465 Hartree

| $\lambda_{\max}$ | $f$    | $\lambda_{\max}$ | $f$    | Cartesian Coordinates |           |           |           |
|------------------|--------|------------------|--------|-----------------------|-----------|-----------|-----------|
| 598.82           | 0.0000 | 339.33           | 0.0000 | C                     | -1.257125 | -0.935665 | -0.000055 |
|                  |        |                  |        | C                     | -1.269528 | 0.498315  | -0.000037 |
|                  |        |                  |        | C                     | 0.000001  | 1.266950  | -0.000096 |
| 517.86           | 0.0031 | 337.74           | 0.0049 | C                     | 1.269529  | 0.498314  | -0.000033 |
|                  |        |                  |        | C                     | 1.257124  | -0.935662 | -0.000061 |
| 468.91           | 0.0063 | 331.42           | 0.0000 | C                     | -0.000001 | -1.555757 | -0.000197 |
|                  |        |                  |        | C                     | -2.490428 | -1.635509 | 0.000006  |
| 414.66           | 0.0414 | 307.22           | 0.0232 | C                     | -3.686255 | -0.938316 | 0.000094  |
|                  |        |                  |        | C                     | -3.693166 | 0.469109  | 0.000116  |
| 413.41           | 0.0243 | 306.50           | 0.0310 | C                     | -2.494757 | 1.174319  | 0.000041  |
|                  |        |                  |        | C                     | 2.494759  | 1.174317  | 0.000056  |
|                  |        |                  |        | C                     | 3.693166  | 0.469106  | 0.000126  |
| 396.36           | 0.0000 | 299.93           | 0.0000 | C                     | 3.686253  | -0.938316 | 0.000083  |
|                  |        |                  |        | C                     | 2.490427  | -1.635508 | -0.000008 |
| 384.11           | 0.0000 | 295.82           | 0.0010 | O                     | 0.000001  | 2.502987  | -0.000122 |
|                  |        |                  |        | H                     | -2.478936 | -2.721281 | -0.000020 |
| 366.27           | 0.0000 | 285.70           | 0.0003 | H                     | -4.626877 | -1.482278 | 0.000147  |
|                  |        |                  |        | H                     | -4.638186 | 1.004789  | 0.000196  |
|                  |        |                  |        | H                     | -2.474766 | 2.259736  | 0.000051  |
| 352.80           | 0.0000 | 283.43           | 0.0003 | H                     | 2.474770  | 2.259735  | 0.000082  |
|                  |        |                  |        | H                     | 4.638186  | 1.004786  | 0.000217  |
| 343.71           | 0.1723 | 266.57           | 0.0039 | H                     | 4.626874  | -1.482281 | 0.000125  |
|                  |        |                  |        | H                     | 2.478934  | -2.721280 | -0.000047 |

**Table S4.** TD-B3LYP/6-311+G(d,p)//B3LYP/6-31G(d) calculations of triplet AN and its Cartesian coordinates

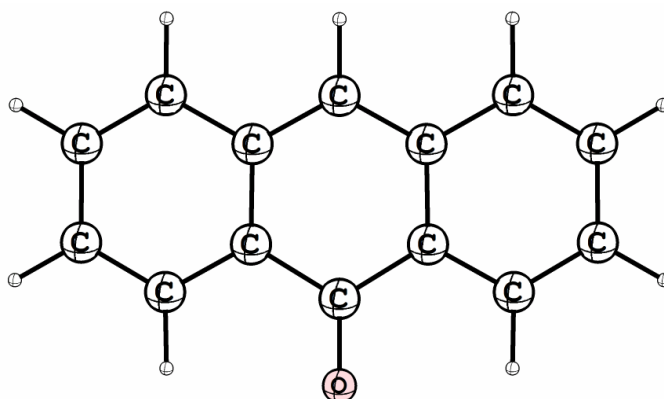

E = -614.288170904 Hartree

| $\lambda_{\max}$ | $f$    | $\lambda_{\max}$ | $f$    | Cartesian Coordinates |           |           |           |
|------------------|--------|------------------|--------|-----------------------|-----------|-----------|-----------|
| 643.79           | 0.0000 | 307.99           | 0.0264 | C                     | -1.240609 | -0.902048 | -0.000110 |
|                  |        |                  |        | C                     | -1.262874 | 0.525198  | -0.000077 |
|                  |        |                  |        | C                     | 0.000000  | 1.298817  | -0.000106 |
| 526.89           | 0.0011 | 305.56           | 0.0000 | C                     | 1.262874  | 0.525198  | -0.000077 |
|                  |        |                  |        | C                     | 1.240609  | -0.902048 | -0.000110 |
|                  |        |                  |        | C                     | 0.000000  | -1.589215 | -0.000278 |
| 500.89           | 0.0135 | 286.29           | 0.0006 | C                     | -2.476866 | -1.598808 | 0.000027  |
|                  |        |                  |        | C                     | -3.676713 | -0.909528 | 0.000180  |
| 436.84           | 0.0369 | 269.37           | 0.0009 | C                     | -3.686687 | 0.497872  | 0.000165  |
|                  |        |                  |        | C                     | -2.487905 | 1.202423  | 0.000030  |
| 430.38           | 0.0416 | 265.28           | 0.0003 | C                     | 2.487905  | 1.202423  | 0.000030  |
|                  |        |                  |        | C                     | 3.686687  | 0.497872  | 0.000165  |
|                  |        |                  |        | C                     | 3.676713  | -0.909528 | 0.000180  |
| 344.50           | 0.0010 | 259.18           | 0.0000 | C                     | 2.476866  | -1.598808 | 0.000027  |
|                  |        |                  |        | O                     | 0.000000  | 2.535444  | -0.000113 |
| 343.77           | 0.1410 | 256.29           | 0.0176 | H                     | -2.467478 | -2.686086 | 0.000029  |
|                  |        |                  |        | H                     | -4.615359 | -1.457016 | 0.000301  |
|                  |        |                  |        | H                     | -4.632310 | 1.032643  | 0.000238  |
| 337.28           | 0.0243 | 254.63           | 0.4719 | H                     | -2.468409 | 2.287589  | 0.000001  |
|                  |        |                  |        | H                     | 2.468409  | 2.287589  | 0.000001  |
|                  |        |                  |        | H                     | 4.632310  | 1.032643  | 0.000238  |
| 334.21           | 0.0000 | 249.89           | 0.0012 | H                     | 4.615359  | -1.457016 | 0.000301  |
|                  |        |                  |        | H                     | 2.467478  | -2.686086 | 0.000029  |
| 314.86           | 0.0226 | 247.93           | 0.0000 | H                     | 0.000000  | -2.676735 | -0.000517 |

**Table S5.** TD-B3LYP/6-311+G(d,p)//B3LYP/6-31G(d) calculations of radical ANH• and its Cartesian coordinates



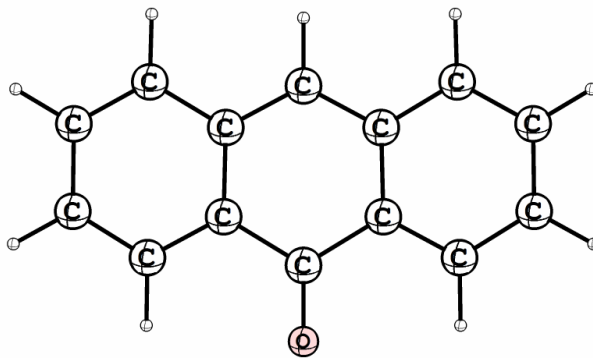

E = -614.031287028 Hartree

| $\lambda_{\max}$ | $f$    | $\lambda_{\max}$ | $f$    | Cartesian Coordinates |           |           |           |
|------------------|--------|------------------|--------|-----------------------|-----------|-----------|-----------|
| 657.21           | 0.0000 | 243.00           | 0.0002 | C                     | 1.243636  | -0.879941 | 0.000024  |
|                  |        |                  |        | C                     | 1.277641  | 0.548251  | 0.000018  |
|                  |        |                  |        | C                     | 0.000000  | 1.327974  | 0.000008  |
| 513.64           | 0.0208 | 241.04           | 0.4188 | C                     | -1.277641 | 0.548251  | 0.000018  |
|                  |        |                  |        | C                     | -1.243636 | -0.879941 | 0.000024  |
|                  |        |                  |        | C                     | 0.000000  | -1.546790 | 0.000065  |
| 452.22           | 0.0325 | 230.77           | 0.0002 | C                     | 2.458254  | -1.611441 | -0.000014 |
|                  |        |                  |        | C                     | 3.673970  | -0.939145 | -0.000061 |
|                  |        |                  |        | C                     | 3.691616  | 0.461168  | -0.000019 |
| 428.04           | 0.3215 | 226.26           | 0.0001 | C                     | 2.496804  | 1.204457  | 0.000026  |
|                  |        |                  |        | C                     | -2.496804 | 1.204457  | 0.000026  |
|                  |        |                  |        | C                     | -3.691616 | 0.461168  | -0.000019 |
| 300.64           | 0.0000 | 224.75           | 0.0078 | C                     | -3.673970 | -0.939145 | -0.000061 |
|                  |        |                  |        | C                     | -2.458254 | -1.611441 | -0.000014 |
|                  |        |                  |        | O                     | 0.000000  | 2.548037  | -0.000026 |
| 290.54           | 0.0371 | 219.73           | 0.0023 | H                     | 2.428399  | -2.697463 | -0.000017 |
|                  |        |                  |        | H                     | 4.605518  | -1.495293 | -0.000120 |
|                  |        |                  |        | H                     | 4.642800  | 0.985338  | -0.000025 |
| 279.36           | 0.0000 | 215.56           | 0.0249 | H                     | 2.513449  | 2.289498  | 0.000063  |
|                  |        |                  |        | H                     | -2.513449 | 2.289498  | 0.000063  |
|                  |        |                  |        | H                     | -4.642800 | 0.985338  | -0.000025 |
| 265.19           | 0.0000 | 213.72           | 0.0002 | H                     | -4.605518 | -1.495293 | -0.000120 |
|                  |        |                  |        | H                     | -2.428399 | -2.697463 | -0.000017 |
|                  |        |                  |        | H                     | 0.000000  | -2.635744 | 0.000266  |
| 255.64           | 0.0000 | 207.36           | 0.3707 |                       |           |           |           |
|                  |        |                  |        |                       |           |           |           |
|                  |        |                  |        |                       |           |           |           |
| 255.26           | 0.2509 | 206.08           | 0.0421 |                       |           |           |           |
|                  |        |                  |        |                       |           |           |           |
|                  |        |                  |        |                       |           |           |           |

**Table S6.** TD-B3LYP/6-311+G(d,p)//B3LYP/6-31G(d) calculations of ANH<sup>+</sup> and its Cartesian coordinates

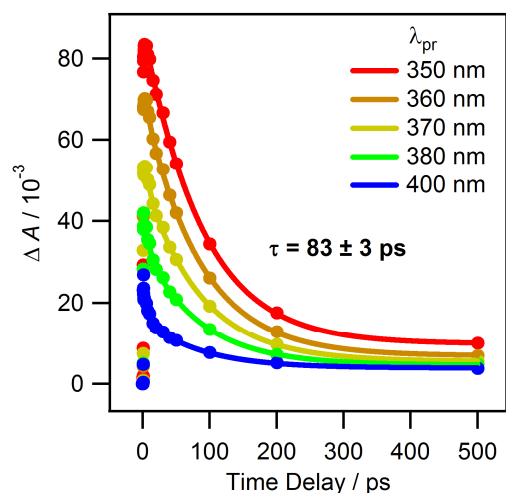

**Figure S1.** Kinetic traces were produced by ultrafast LFP ( $\lambda_{\text{ex}} = 308 \text{ nm}$ ) of DDBC in acetonitrile. The kinetic traces were probed at 350, 360, 370, 380 and 400 nm, respectively and globally fitted in equation  $\Delta OD = A_1 \exp(-t/\tau_1) + A_2 \exp(-t/\tau_2) + A_3$ , where  $\tau_1$  is unlinked and  $\tau_2$  is linked. The value  $83 \pm 3 \text{ ps}$  shown above is the common time constant  $\tau_2$ , which is assigned to the lifetime of  $^1\text{DBC}$  in acetonitrile.

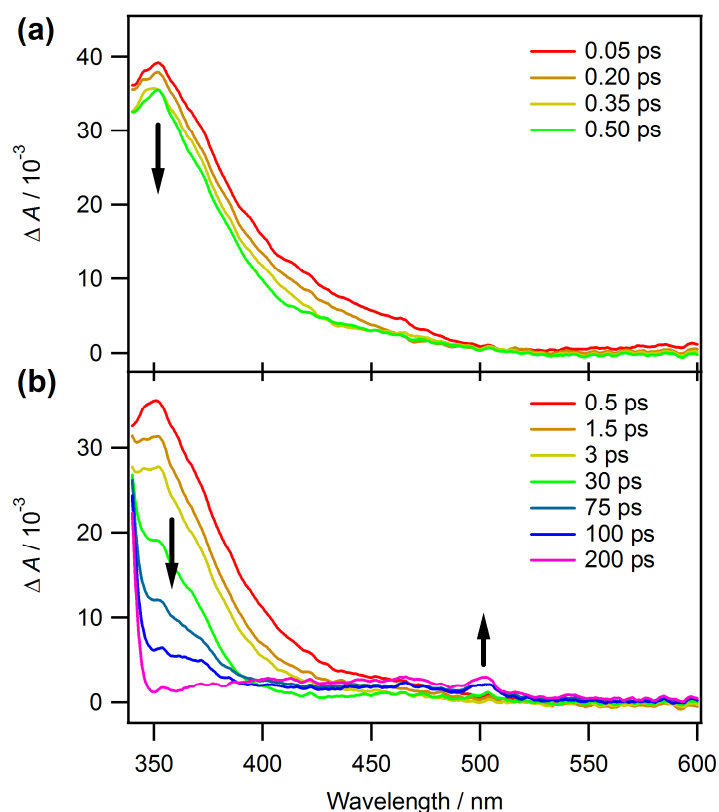

**Figure S2.** The transient spectra were generated by ultrafast LFP (308 nm) of DDBC in cyclohexane with time windows (a) 2–30 ps, (b) 40–200 ps and (c) 500–2500 ps.

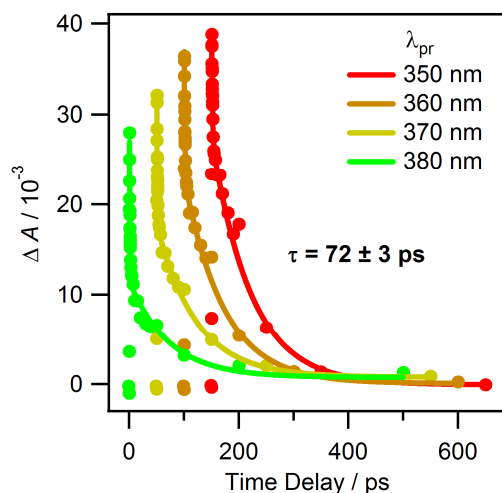

**Figure S3.** Kinetic traces were produced by ultrafast LFP ( $\lambda_{\text{ex}} = 308 \text{ nm}$ ) of DDBC in cyclohexane. The kinetic traces were probed at 350, 360, 370 and 380, respectively and globally fitted to the equation  $\Delta OD = A_1 \exp(-t/\tau_1) + A_2 \exp(-t/\tau_2) + A_3$ , where  $\tau_1$  is unlinked and  $\tau_2$  is linked. The value  $72 \pm 3 \text{ ps}$  shown in the figure is the common time constant  $\tau_2$ , which is assigned to the lifetime of  $^1\text{DBC}$  in cyclohexane. The kinetic traces are separated by 50 ps for clarity.

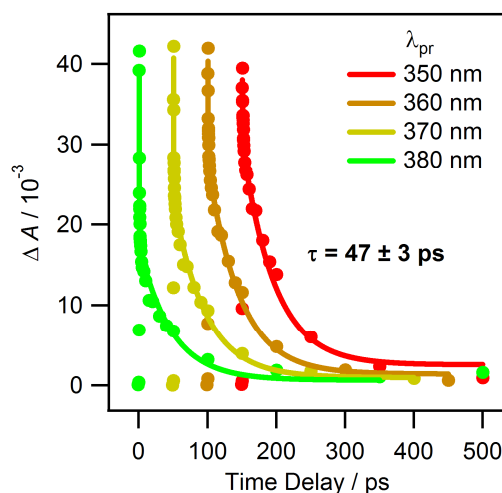

**Figure S4.** Kinetic traces were produced by ultrafast LFP ( $\lambda_{\text{ex}} = 308 \text{ nm}$ ) of DDBC in cyclohexene. The kinetic traces were probed at 350, 360, 370 and 380, respectively and globally fitted to the equation  $\Delta OD = A_1 \exp(-t/\tau_1) + A_2 \exp(-t/\tau_2) + A_3$ , where  $\tau_1$  is unlinked and  $\tau_2$  is linked. The value  $47 \pm 3 \text{ ps}$  shown in the figure is the common time constant  $\tau_2$ , which is assigned to the lifetime of  $^1\text{DBC}$  in cyclohexene. The kinetic traces are separated by 50 ps for clarity.

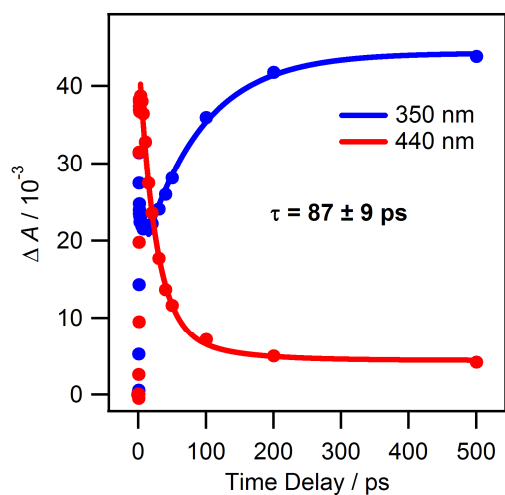

**Figure S5.** Kinetic traces were produced by ultrafast LFP ( $\lambda_{\text{ex}} = 308$  nm) of DAN in acetonitrile. The kinetic traces were probed at 350 and 440, respectively and globally fitted to the equations  $\Delta OD = A_1 \exp(-t/\tau_1) + A_2$  and  $\Delta OD = A_1 \exp(-t/\tau_1) + A_2 \exp(-t/\tau_2) + A_3$ , where  $\tau_1$  is linked. The value  $87 \pm 9$  ps shown above is the common time constant  $\tau_1$ , which is assigned to the lifetime of  $^1\text{AN}$  in acetonitrile.  $\tau_2$  is  $24 \pm 3$  ps, which is assigned to the vibrational cooling of  $^1\text{AN}$ .

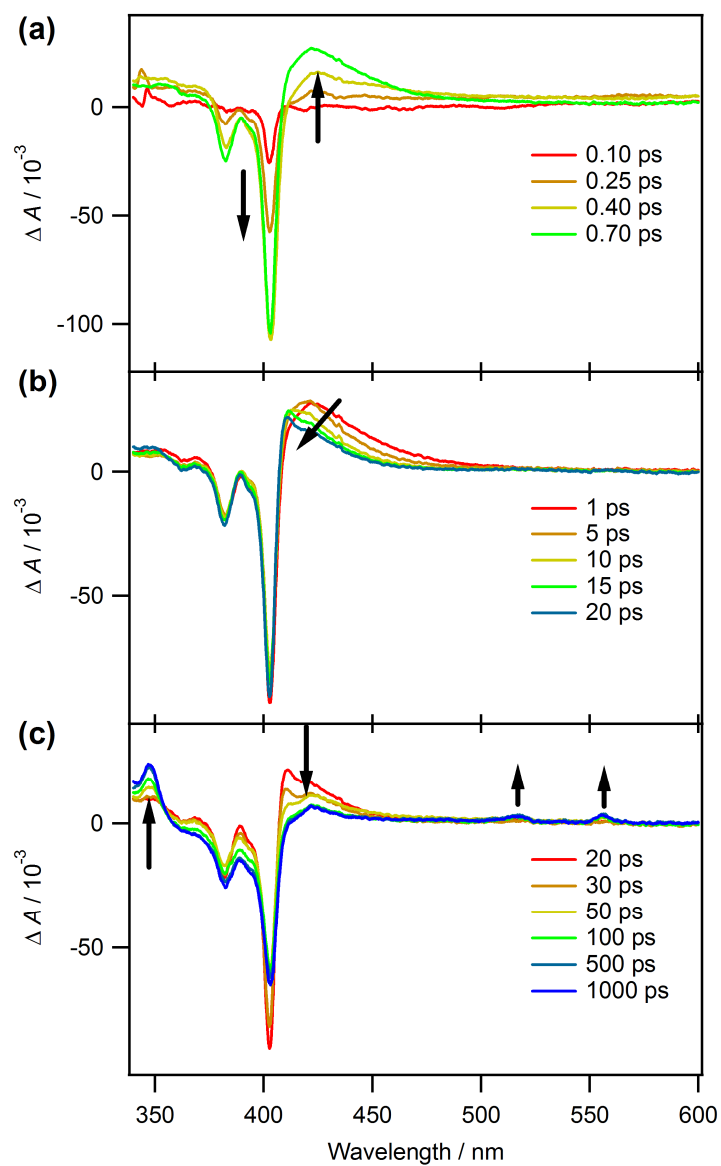

**Figure S6.** Transient spectra were generated by ultrafast LFP ( $\lambda_{\text{ex}} = 308 \text{ nm}$ ) of DAN in cyclohexane with time windows of (a) 0.10–0.70 ps, (b) 1–20 ps and (c) 20–1000 ps.

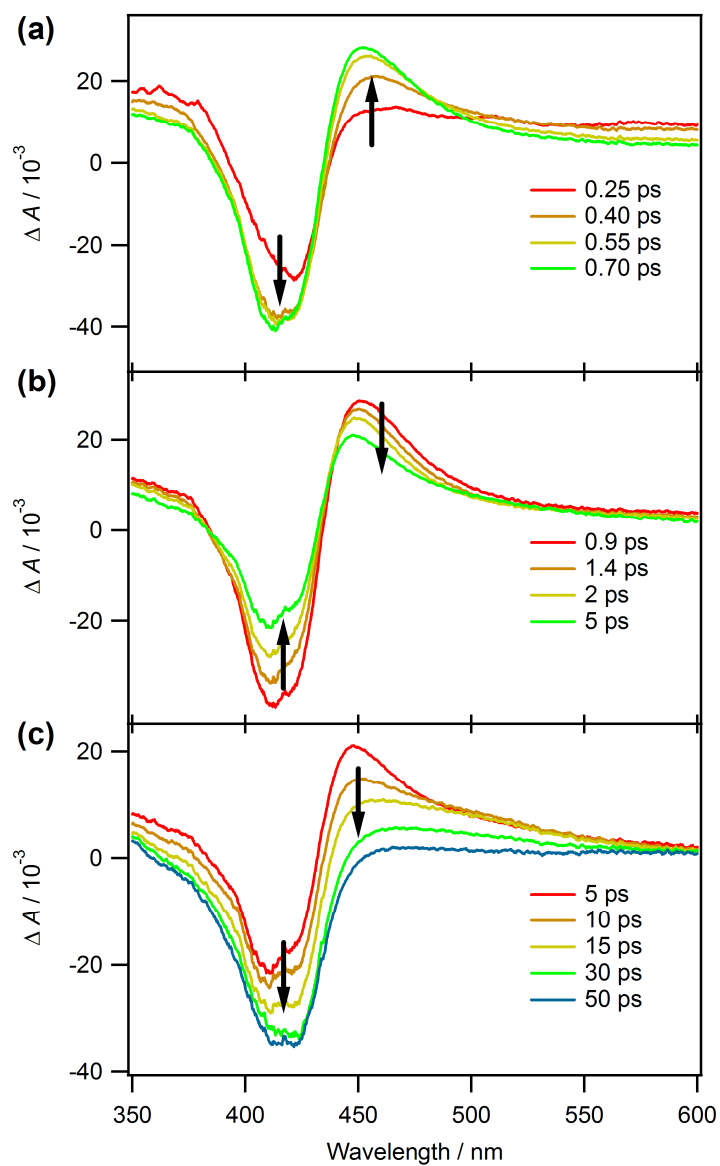

**Figure S7.** Transient spectra were generated by ultrafast LFP ( $\lambda_{ex} = 308$  nm) of DAN in methanol with time windows of (a) 0.25–0.70 ps, (b) 0.9–5 ps and (c) 5–50 ps.

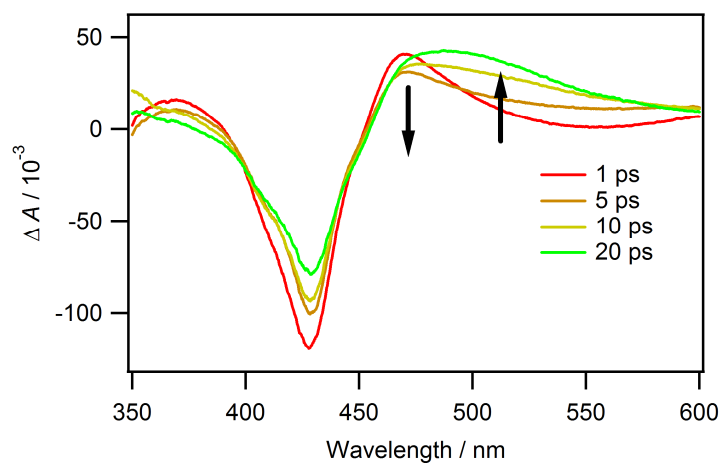

**Figure S8.** Transient spectra were generated by ultrafast LFP ( $\lambda_{\text{ex}} = 308$  nm) of DAN in 2,2,2-trifluoroethanol with a time window of 1–20 ps.
